# Supplementary material
Source: ML conference proceedings conference paper supplement (https://proceedings.mlr.press/v97/ho19a.html)
Supplement: Supplementary file 1 [file ho19a-supp.pdf]

---

## **Flow++: Improving Flow-Based Generative Models with Variational Dequantization and Architecture Design – Supplementary Material**

---

In subsequent pages, we present more Flow++ samples for CIFAR 10, 32 x 32 Imagenet, 64 x 64 Imagenet, 64 x 64 Imagenet with 5-bits per color channel, 64 x 64 CelebA HQ with 3-bits per color channel and 64 x 64 CelebA HQ with 5-bits per color channel.

Our implementation can be found at <https://github.com/aravindsrinivas/flowpp>.

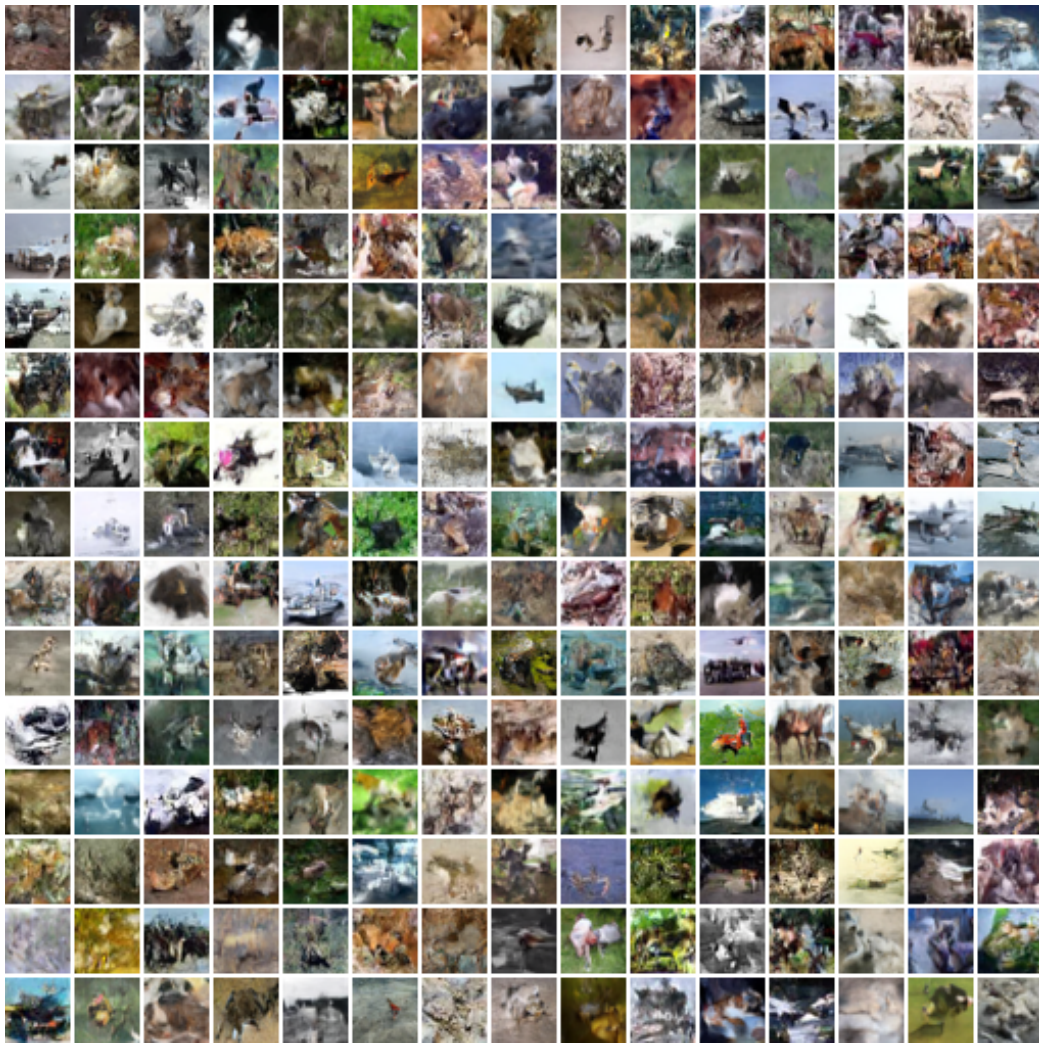

Figure 1. Samples from Flow++ trained on CIFAR10

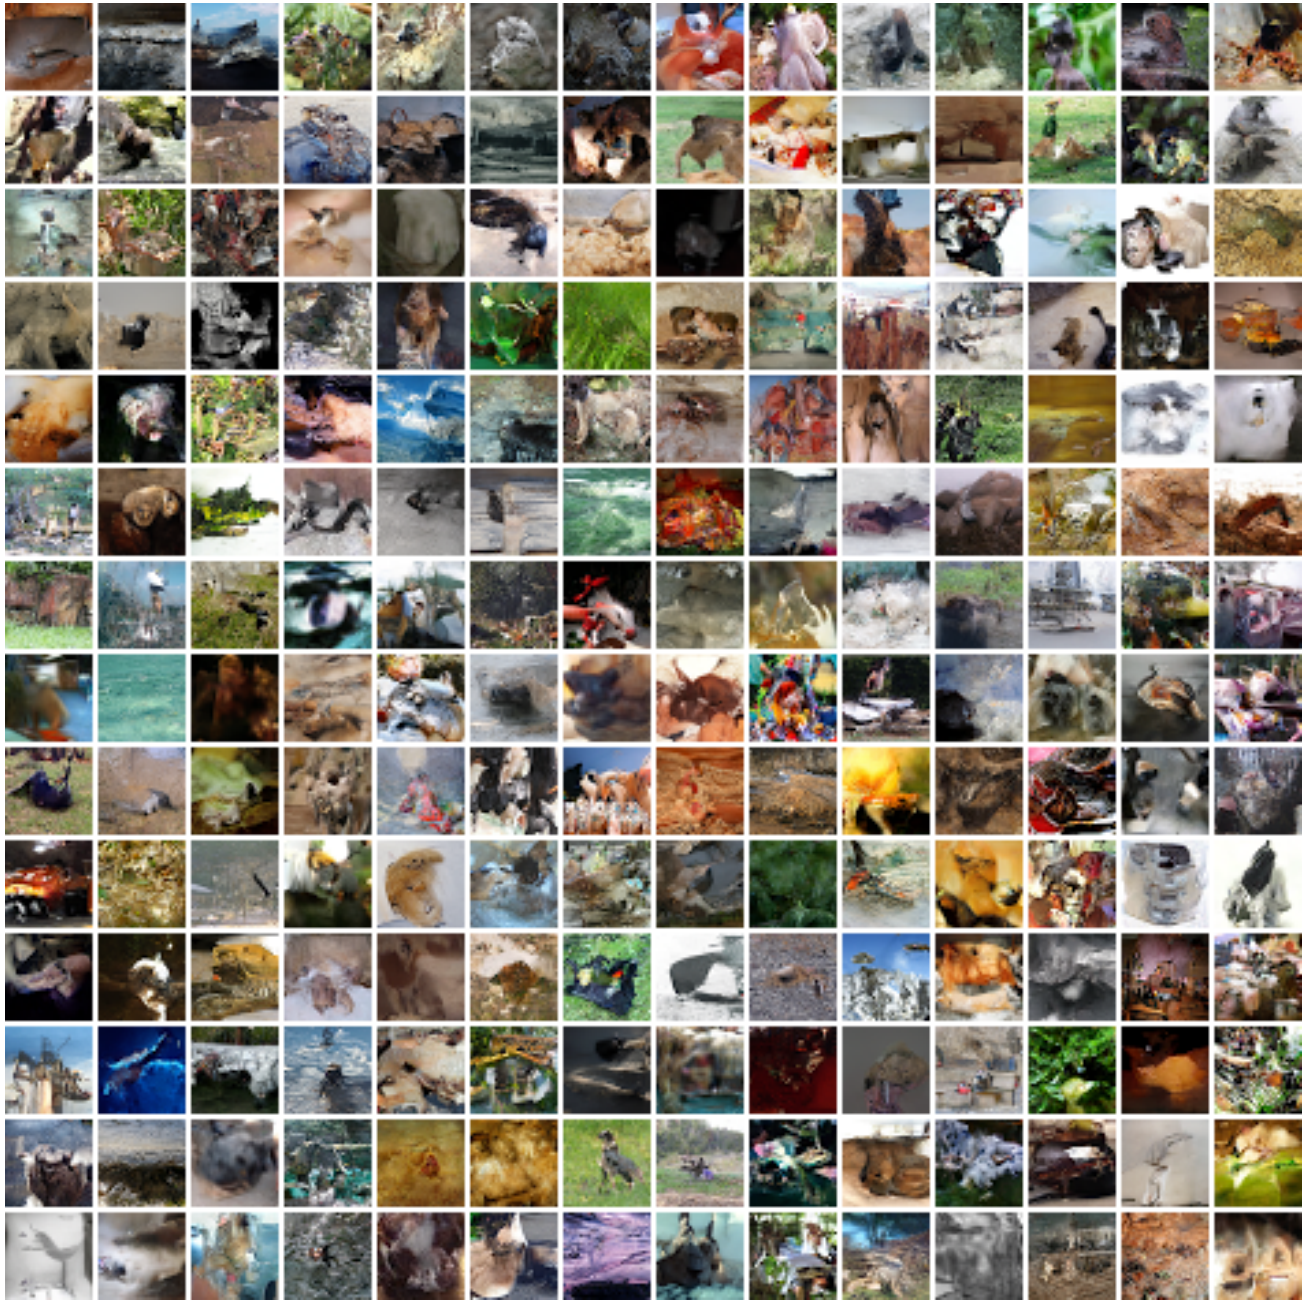

Figure 2. Samples from Flow++ trained on 32x32 ImageNet

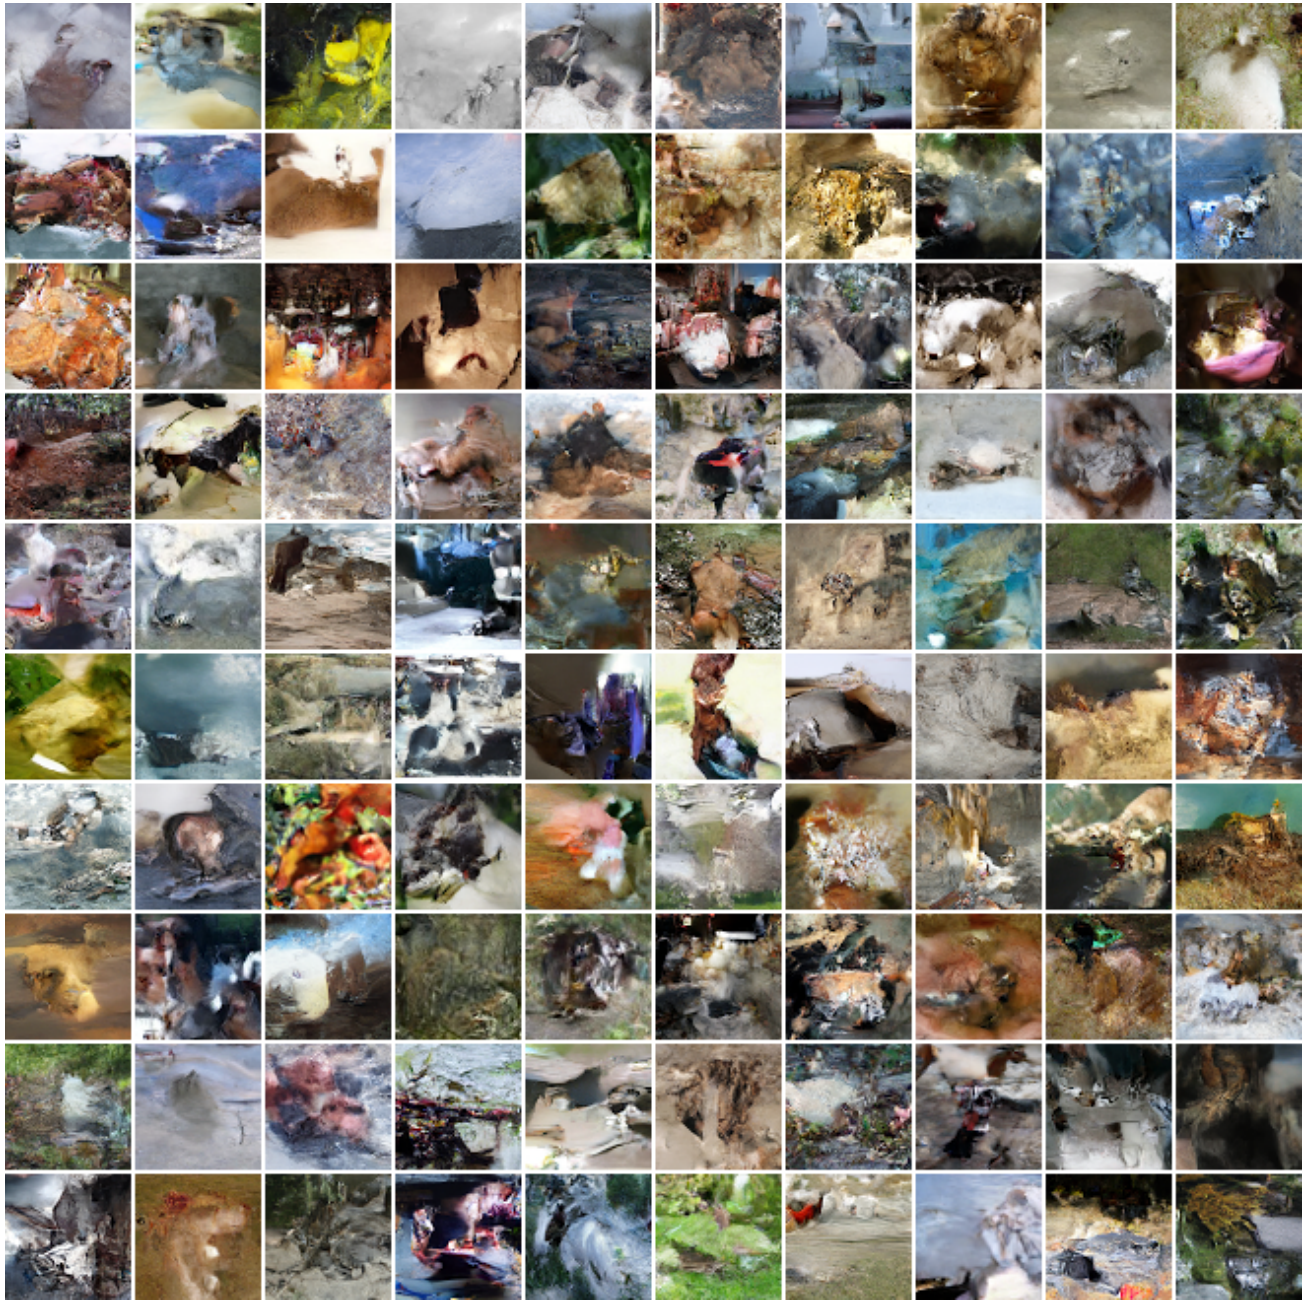

Figure 3. Samples from Flow++ trained on 64x64 ImageNet

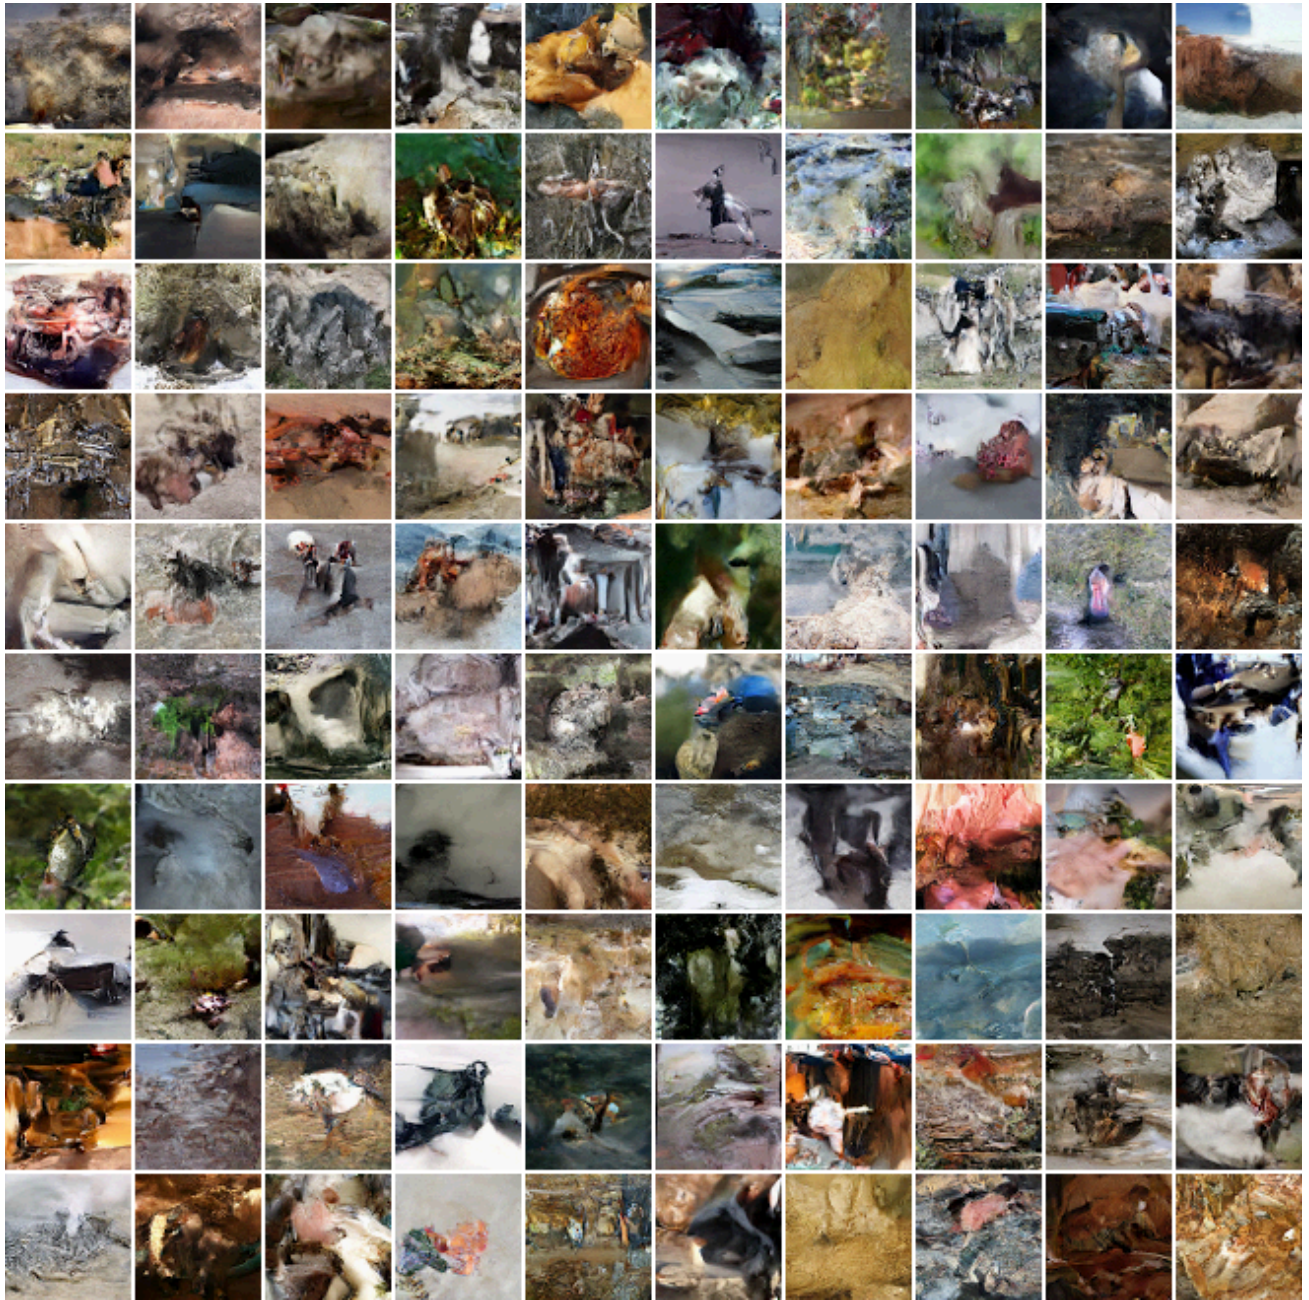

Figure 4. Samples from Flow++ trained on 5-bit 64x64 ImageNet

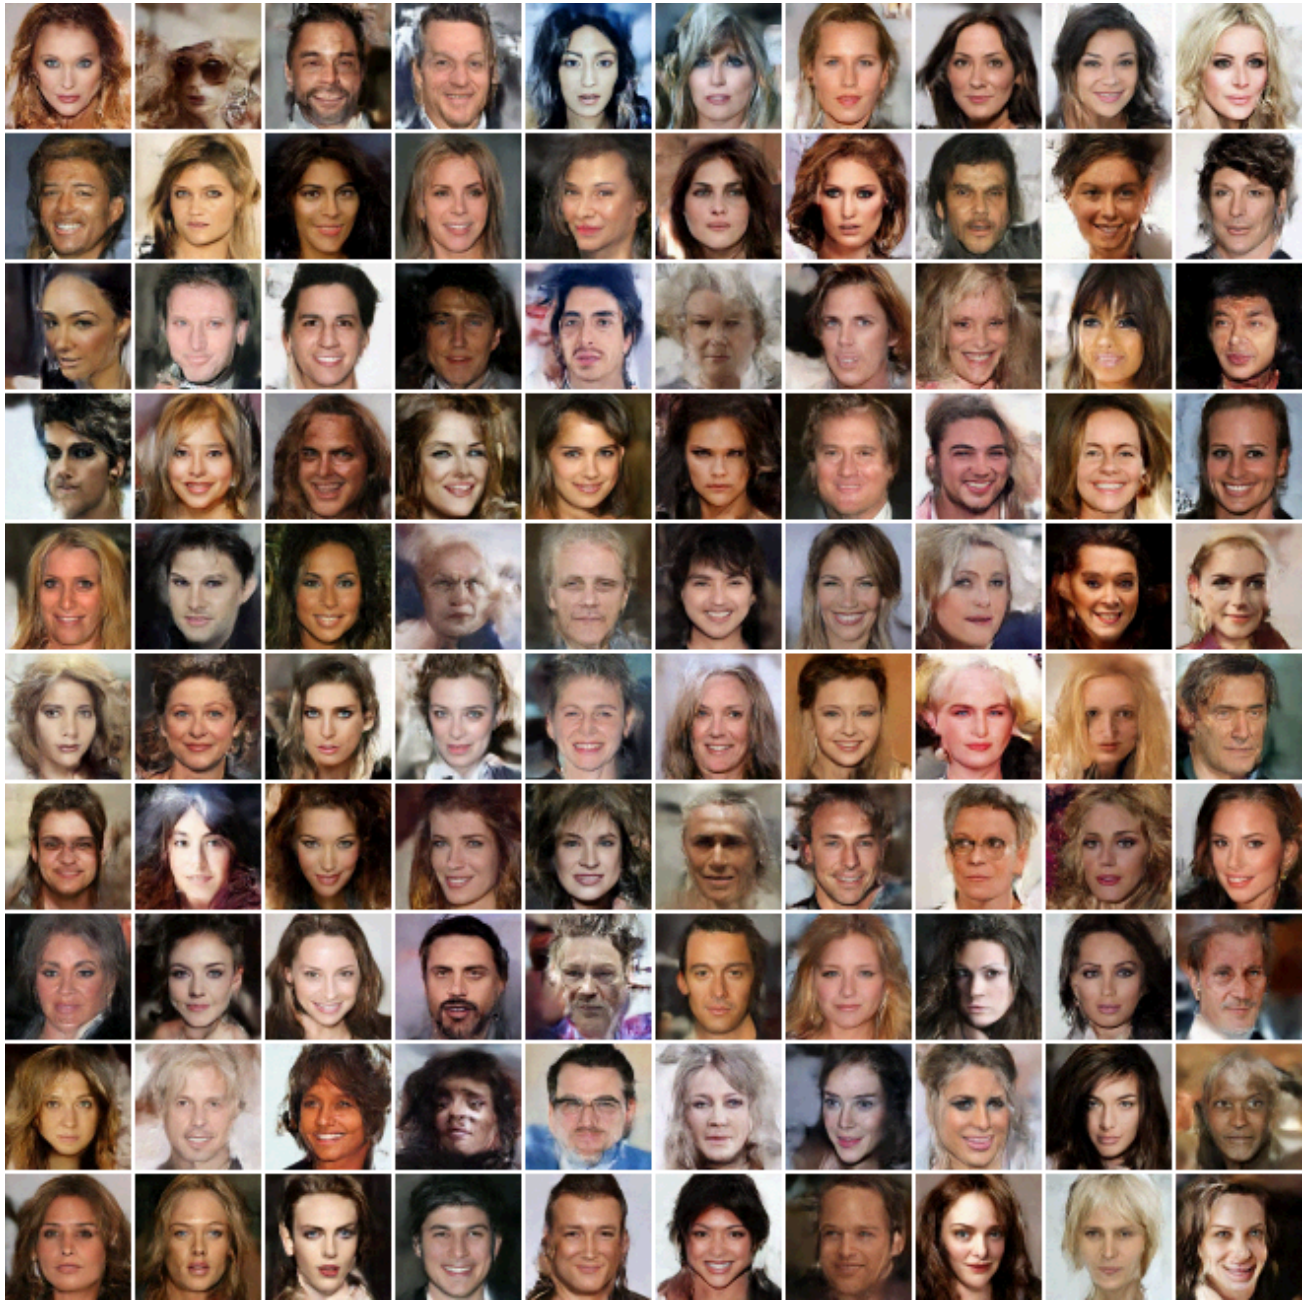

Figure 5. Samples from Flow++ trained on 5-bit 64x64 CelebA

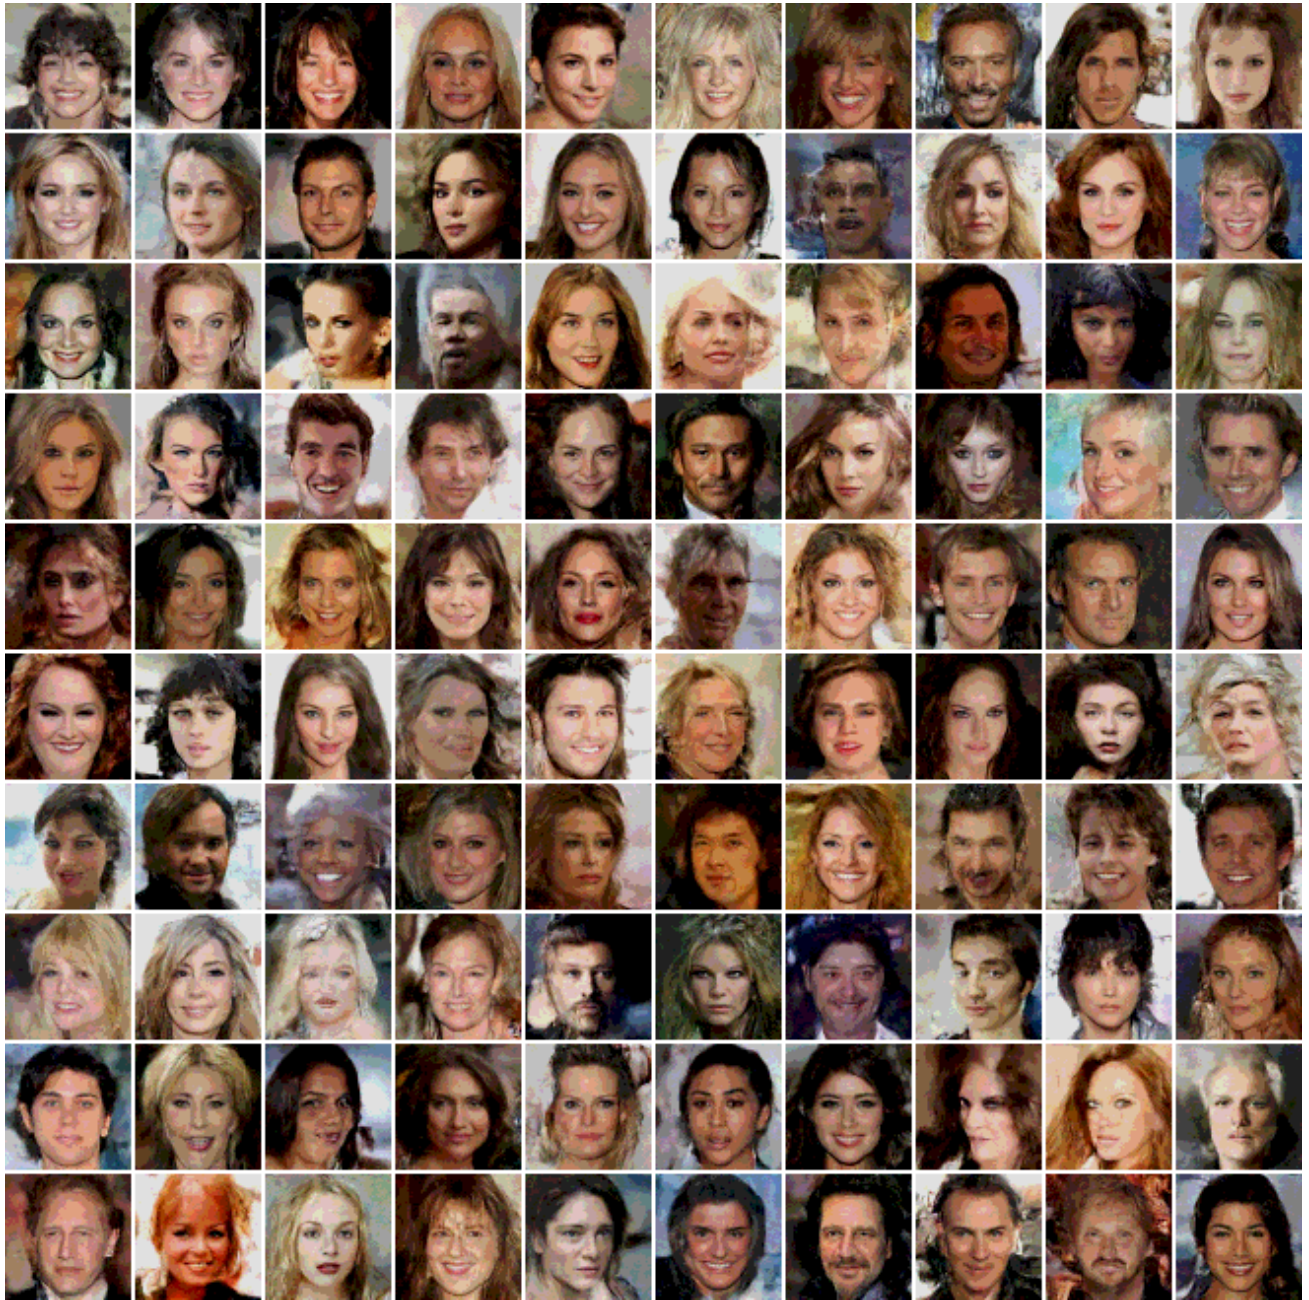

Figure 6. Samples from Flow++ trained on 3-bit 64x64 CelebA
